# Supplementary material for: Interrater agreement of two adverse drug reaction causality assessment methods: A randomised comparison of the Liverpool Adverse Drug Reaction Causality Assessment Tool and the World Health Organization-Uppsala Monitoring Centre system
Source: PLOS journal article supplement (doi:10.1371/journal.pone.0172830), 2017-02-24
Supplement: S5 (10.1371/journal.pone.0172830.s005) [file journal.pone.0172830.s005]

Table S1. Raters' distribution of outcomes when using two different causality assessment methods.

|                                                 | Definite         | Probable        | Possible        | Unlikely        | Unassessable    | Total      |
|-------------------------------------------------|------------------|-----------------|-----------------|-----------------|-----------------|------------|
| <b>Rater 1 – WHO-UMC</b>                        | 3 (14%)          | 2 (10%)         | 4 (19%)         | 8 (38%)         | 4 (19%)         | 21         |
| <b>Rater 2 – WHO-UMC</b>                        | 2 (7.7%)         | 6 (23%)         | 8 (31%)         | 7 (27%)         | 3 (12%)         | 26         |
| <b>Rater 3 – WHO-UMC</b>                        | 3 (12%)          | 1 (3.9%)        | 11 (42%)        | 8 (31%)         | 3 (12%)         | 26         |
| <b>Rater 4 – WHO-UMC</b>                        | 0                | 2 (8.7%)        | 7 (30%)         | 11 (48%)        | 3 (13%)         | 23         |
| <b>Subtotal: WHO-UMC</b>                        | <b>8 (8.3%)</b>  | <b>11 (11%)</b> | <b>30 (31%)</b> | <b>34 (35%)</b> | <b>13 (14%)</b> | <b>96</b>  |
| <b>Rater 1 – LCAT</b>                           | 1 (3.7%)         | 8 (30%)         | 7 (26%)         | 9 (33%)         | 2 (7.4%)        | 27         |
| <b>Rater 2 – LCAT</b>                           | 0                | 12 (55%)        | 2 (9.1%)        | 8 (36%)         | 0               | 22         |
| <b>Rater 3 – LCAT</b>                           | 1 (4.6%)         | 2 (9.1%)        | 11 (50%)        | 4 (18%)         | 4 (18%)         | 22         |
| <b>Rater 4 – LCAT</b>                           | 1 (4.0%)         | 7 (28%)         | 5 (20%)         | 11 (44%)        | 1 (4.0%)        | 25         |
| <b>Subtotal: LCAT</b>                           | <b>3 (3.1%)</b>  | <b>29 (30%)</b> | <b>25 (26%)</b> | <b>32 (33%)</b> | <b>7 (7.3%)</b> | <b>96</b>  |
| <b>Combined total: WHO-UMC and LCAT methods</b> | <b>11 (5.7%)</b> | <b>40 (21%)</b> | <b>55 (29%)</b> | <b>66 (34%)</b> | <b>20 (10%)</b> | <b>192</b> |
